# Supplementary material
Source: MDPI journal article supplement (https://www.mdpi.com/2071-1050/15/14/11049)
Supplement: s1 [file s1]

## Supplementary data

Table S1: Physico-chemical characteristics of soil used in experiment.

| Sr.No. | Parameters                              | Values    |
|--------|-----------------------------------------|-----------|
| 1      | Soil pH                                 | 7.63      |
| 2      | EC (dS/m)                               | 0.59      |
| 3      | Texture                                 | Clay loam |
| 4      | Total Organic matter (%)                | 0.83      |
| 5      | Water holding capacity (%)              | 62        |
| 6      | Nitrate Nitrogen (mg Kg <sup>-1</sup> ) | 61.3      |
| 7      | Phosphorus (mg Kg <sup>-1</sup> )       | 32.7      |
| 8      | Potassium (mg Kg <sup>-1</sup> )        | 684.3     |
| 9      | Sodium (mg Kg <sup>-1</sup> )           | 39.7      |
| 10     | Magnesium (mg Kg <sup>-1</sup> )        | 328.8     |
| 11     | Iron (mg Kg <sup>-1</sup> )             | 2876.1    |
| 12     | Lead (mg Kg <sup>-1</sup> )             | 4.28      |

Table S2: Summary of Box-Behnken Design.

| <b>Box-Behnken Design</b> |    |
|---------------------------|----|
| Factor                    | 4  |
| Base run                  | 27 |
| Base block                | 1  |
| Replicates                | 1  |
| Total run                 | 27 |
| Total blocks              | 1  |
| Center points             | 4  |

Table S3: Effects of *M. paraoxydans* and citric acid on germination and growth of *P. hortorum* in Petri plates containing 1/2 Murashige and Skoog (MS) agar medium supplemented with different concentrations of Pb (0, 10, 20, 30 and 40 mg L<sup>-1</sup>).

| Treatments                                                                    | Pb concentration | Germination (%)        | Plant length (cm)      | SVI                      |
|-------------------------------------------------------------------------------|------------------|------------------------|------------------------|--------------------------|
| Controls                                                                      | 0                | 100 <sup>a</sup>       | 4.7 <sup>c</sup>       | 470 <sup>c</sup>         |
| Pb Concentration                                                              | 10               | 95 <sup>b</sup>        | 5.7 <sup>ab</sup>      | 541.5 <sup>bc</sup>      |
|                                                                               | 20               | 87 <sup>c</sup>        | 4.1 <sup>cd</sup>      | 356.7 <sup>d</sup>       |
|                                                                               | 30               | 80 <sup>d</sup>        | 2.7 <sup>de</sup>      | 216 <sup>ef</sup>        |
|                                                                               | 40               | 70 <sup>e</sup>        | 1.4 <sup>e</sup>       | 98 <sup>f</sup>          |
| <i>M. paraoxydans</i><br>(1.5 OD)                                             | 10               | 95 <sup>b</sup>        | 6.1 <sup>ab</sup>      | 579.5 <sup>b</sup>       |
|                                                                               | 20               | 90 <sup>bc</sup>       | 5.2 <sup>bc</sup>      | 468 <sup>cd</sup>        |
|                                                                               | 30               | 84 <sup>cd</sup>       | 3.6 <sup>d</sup>       | 302.4 <sup>de</sup>      |
|                                                                               | 40               | 80 <sup>d</sup>        | 2.2 <sup>de</sup>      | 176 <sup>ef</sup>        |
| Citric acid<br>(10 mmol L <sup>-1</sup> )                                     | 10               | 95 <sup>b</sup>        | 5.3 <sup>bc</sup>      | 503.5 <sup>bc</sup>      |
|                                                                               | 20               | 90 <sup>bc</sup>       | 5 <sup>bc</sup>        | 450 <sup>cd</sup>        |
|                                                                               | 30               | 80 <sup>d</sup>        | 3.1 <sup>d</sup>       | 248 <sup>de</sup>        |
|                                                                               | 40               | 75 <sup>de</sup>       | 2 <sup>de</sup>        | 150 <sup>ef</sup>        |
| <i>M. paraoxydans</i><br>(1.5 OD) + citric<br>acid (10 mmol L <sup>-1</sup> ) | 10               | <b>98<sup>ab</sup></b> | <b>6.4<sup>a</sup></b> | <b>627.2<sup>a</sup></b> |
|                                                                               | 20               | 92 <sup>bc</sup>       | 5.5 <sup>b</sup>       | 506 <sup>bc</sup>        |
|                                                                               | 30               | 90 <sup>bc</sup>       | 3.8 <sup>cd</sup>      | 342 <sup>cd</sup>        |
|                                                                               | 40               | 85 <sup>cd</sup>       | 2.5 <sup>de</sup>      | 212.5 <sup>ef</sup>      |

Values are the mean of three replicates. Different letters indicates significant difference at p<0.05. Whereas; Germinated seeds (GE) = ((No. of germinated seeds/total No. of seeds) \*10) and seed vigor index (SVI) =GE\*Length of plants.

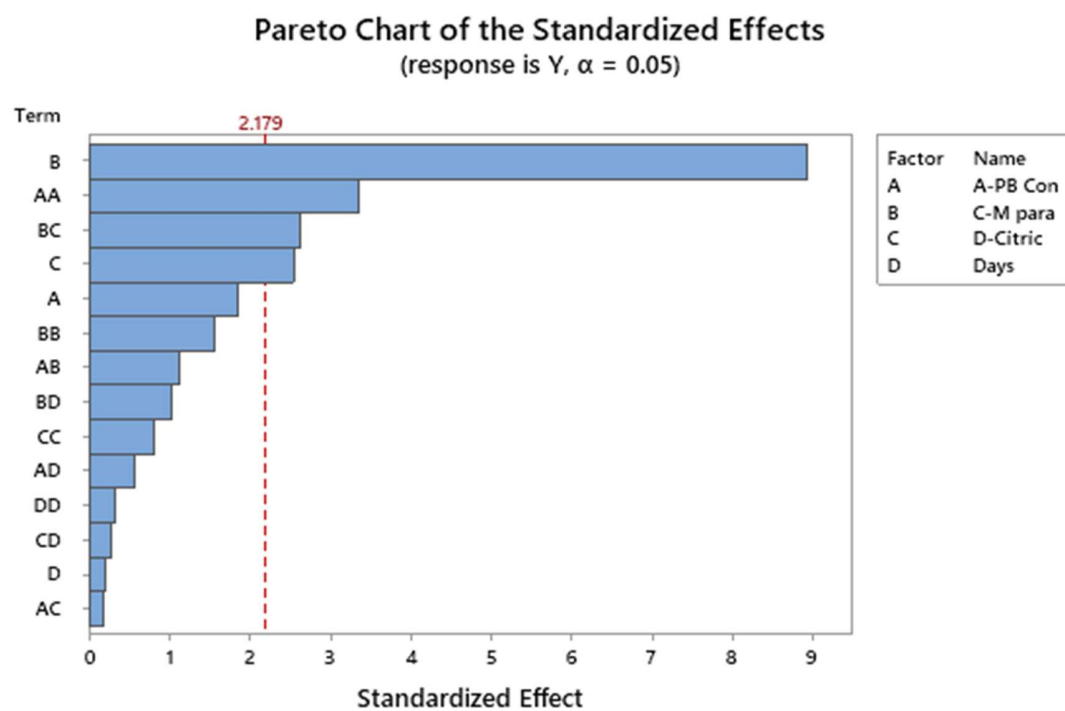

Figure S1: Standardized Effects on four factors Pareto chart.

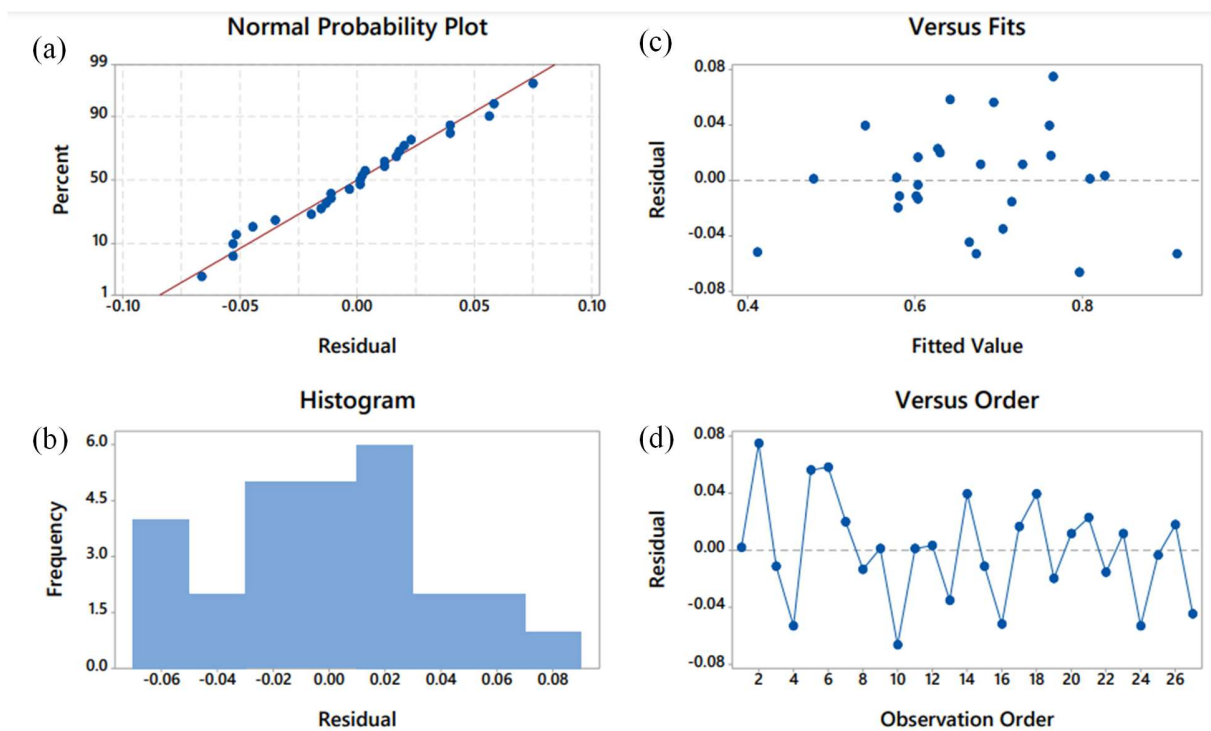

Figure S2: Results of RSM predicted model. Normal probability plot (a); Histogram plot (b); Residual plots for RSM Model Output (c and d).

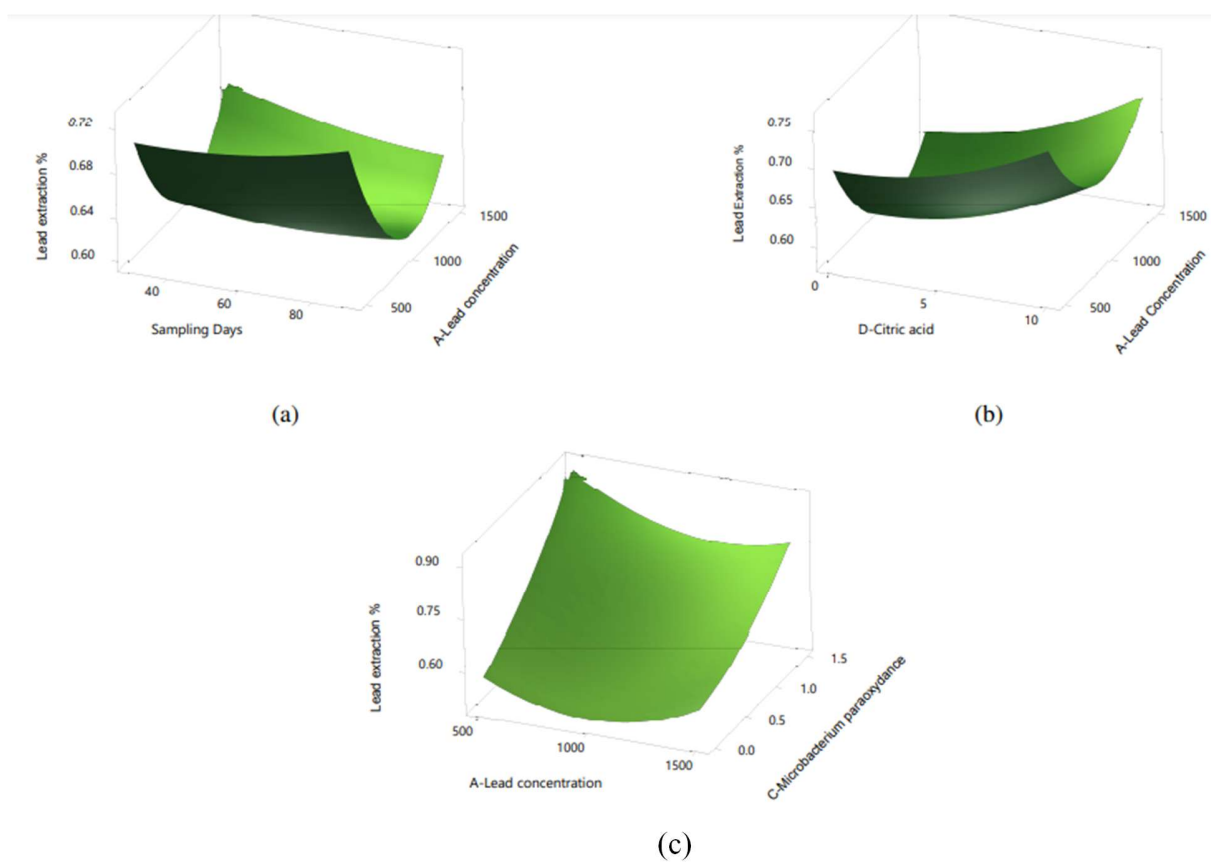

Figure S3: RSM response surface plots for lead concentration and sampling days (a); Lead concentration and citric acid (b); and lead concentration and *M. paraoxydans* (c).
